# Supplementary material for: Prediction of volume of shallow landslides due to rainfall using data-driven models
Source: Copernicus journal article supplement (doi:10.5194/nhess-2024-90), 2024-07-11
Supplement: Supplementary file [file nhess-2024-90-AC2-supplement.pdf]

## **Manuscript number: nhess-2024-90**

My co-authors and I would like to express our gratitude to the reviewer for constructive feedback and suggestions for strengthening our research. The changes we have made to the attached file in response to such feedback and suggestions have been highlighted in blue to facilitate their identification. I would also like to offer my apologies for the length of time it took us to prepare this response. We also record our deep appreciation for the efficient handling of the manuscript.

### **Response to Reviewer #2**

#### **General remarks**

**Comment 1:** In the introduction, the authors should explain more about why volume estimations are crucial for understanding and managing landslide hazards.

Response: Thank you for your valuable comment. As suggested, we have revised the introduction to highlight the critical role of landslide volume estimations in understanding and managing landslide hazards. The revised section of the introduction is provided below.

“To estimate the volume of the soil mass displaceable subsequent to intensive rainfall, is essential to set appropriate mitigation strategies to reduce environmental degradation, infrastructure damage, casualties, and to establish post-disaster resilience policies to restore the socio-economic aspect of communities (Van et al., 2021; Alcántara-Ayala, 2021). This quantification of the volume of landslides due to rainfall (VLDR) is essential for effective risk management (Tacconi et al., 2020), emergency response, engineering design (Cheung, 2021), economic assessment and environmental protection (Alcántara-Ayala and Sassa, 2023). Firstly, to manage landslide risk effectively, the quantification of VLDR can be useful for updating hazard maps to reflect the scale of potential landslides in various regions to facilitate the identification of high-risk zones for monitoring and intervention. In addition, to develop mitigation strategies, such as land stabilization measures and land use planning, planners might put in place strict construction regulations in particular regions that are susceptible to landslides (Mateos et al., 2020). The accurate measurements of VLDR can be used to promote public awareness for safety measures and preparedness (Yang and Adler, 2008). Secondly, estimating precise VLDR is crucial for structural engineers to design a structure that can withstand extreme landslide events. Knowing the exact volume of displaceable material, an engineer can set robust stabilization solutions to prevent future occurrences (Dai and Lee, 2001). Moreover, the VLDR can help design the drainage system to manage water flow by controlling

groundwater and surface runoff to mitigate landslide risks (Dikshit et al., 2019; Kim et al., 2014). Furthermore, to prepare for emergence responses such as resource allocation, evacuation planning, and search and rescue operations, accurate VLDR estimation is necessary to ensure efficient implementation (Fan et al., 2019). To allocate resources effectively, the volume data is needed to determine the expected number of personnel for evacuation, materials sufficient for cleaning up and recovery (Amatya, 2016; Yang and Adler, 2008; Spiker and Gori, 2003). Further, to establish environmental protection measures such as ecosystem impacts, preservation of soil and water quality, and habitat restoration, the estimates of VLDR are essential (Pradhan et al., 2022; Li et al., 2022a; Barik et al., 2017).

To mitigate the economic impacts of landslides, the values of VLDR can be a basis for estimation of property damages, which is critical for settling insurance claims and assessment of financial impacts on communities and government to facilitate efficient budgeting for repairing damaged infrastructure and restoration of affected parts (Klimeš et al., 2017; Dai et al., 2002). The prediction of the VLDR can assist in long-term economic planning for landslide risk by creating disaster preparedness and recovery funds (Winter and Bromhead, 2012). The accurate estimation of the VLDR is an important key for designing strategies for resilience and planning for the protection of the inhabitants of a particular region with certain landslide risks subjected to a predicted quantity of rainfall (Conte et al., 2022). Consequently, for the safety of communities, the selection of infrastructure construction sites must be done in places with low landslide risks (Fan et al., 2017). Further, for the protection of crops, the farmland location, and other land use activities, accurate landslide prediction taking into account real root causes through the analysis of triggering and influencing factors, is crucial to achieve a durable landslide safety management system (Paudel et al., 2003; Lee, 2009; Fan et al., 2017; Chen et al., 2019; Dai et al., 2019; Alcántara-Ayala, 2021). ”

**Comment 2:** The literature review section should be expanded to incorporate more recent studies on landslide volume prediction models, providing a comprehensive overview of the current state of research in this field.

Response: We appreciate this suggestion. We have done an extensive literature review to include recent studies on landslide volume prediction models, offering a more comprehensive overview of the current state of research in this field. Accordingly, the literature review section in the introduction has been updated as,

“The prediction of VLDR has gained the interest of many researchers to understand the mechanism and interaction between triggering and aggravating factors. Saito et al. (2014) studied the relationship between rainfall-triggered landslides to test whether the volume of landslides across Japan that occurred between 2001 and 2011 can be directly predicted from rainfall metrics. The findings revealed that larger landslides occurred when rainfall exceeded certain thresholds, but there were significant discrepancies between peaks of rainfall metrics and maximum landslide volumes, and the total rainfall was the suitable predictor of landslides. Dai and Lee (2001) established the frequency-volume relation for landslides in Hong Kong and noticed that the relation for shallow landslides above 4m<sup>3</sup> followed the power law. The 12-hour rolling rainfall contributed most to the prediction of the volume of landslides. Ju et al. (2023) constructed an area-volume power law model for the estimation of the volume of landslides using high-resolution LiDAR data collected between 2010 and 2020 in Hong Kong. The aim was to estimate accurately the volume of landslides on small-scale landslides. The reliance on localized datasets limits the model's applicability in regions with different geological settings, and the model does not consider all variabilities of landslide characteristics. Razakova et al. (2020) calculated landslide volume using remote sensed data with the aim of assessing the efficiency of aerial photographs in environmental impact assessment and ground-based measurement. The study did not take into account the effect of vegetation and topography and only focused on a single landslide case, which may be a source of bias due to differences in soil composition and environmental factors. Hovius et al. (1997) analyzed multiple sets of aerial photos and frequency-magnitude relation for landslides in New Zealand. The finding pinpointed that the landslides frequency-magnitude followed power law and infrequent large magnitude contributed to the landscape change. The study also noticed the importance of soil composition in the size of the landslides. This work had a limitation due to the reliance on aerial photos only, which cannot provide accurate measurement in regions of dense forest, and the climatic conditions, which are landslide triggering factors, were not considered, and this may affect the generality of the findings. Guzzetti et al. (2008) applied statistical methods on regional landslide inventories and antecedent rainfall data ranging between 10 min to 35 days. The findings revealed that the slope angle and soil type significantly influence landslide volume estimates, and the rainfall intensity is more important than duration. Chatra et al., 2019) applied numerical methods to study the effect of rainfall duration and intensity on the generation of pore pressure in the soil; the finding revealed a higher instability in loose soil compared to medium soil slopes. The work only treated the interaction of soil and rainfall without

considering the environmental factors and human activity, which might also influence mass failure. Recently, the application of GIS technologies has been increasing in the identification of regions susceptible to landslides (landslide zonation) (Chen and Zhang, 2021; Gutierrez-Martin, 2020; Li et al., 2022b). These methods are essential in emergency management because they provide a general overview of zones with a higher probability of landslide occurrence; however, they do not put emphasis on the determination of the approximate value of the volume of failing mass in relation to excessive rainfall events.”

**Comment 3:** The study area section should be enhanced with more detailed information on landslide-triggering factors. Additionally, it would be beneficial to incorporate a figure showing representative rainfall characteristics prior to the recorded landslide events in different parts of the Korean Peninsula. This would help better understand the unique rainfall patterns of the region responsible for landslides.

Response: We appreciate this fruitful comment. As recommended, we have included a rainfall plot within the data subsection in the revised manuscript to ensure logical coherence. Furthermore, we have combined the study area and data into a single section with two subsections for improved clarity. The updated information on the study area and the figure illustrating the rainfall characteristics prior to the recorded landslide events are provided below,

“The region for testing the model is South Korea, characterized by mountainous (63% of total land) relief, especially in the eastern part of the country (Lee et al., 2022). South Korea is located on the southern part of the Korean Peninsula, bordered by the Yellow Sea to the west coast and the East Sea (Sea of Japan) to the East. According to the Korean Meteorological Administration (2020), the country has a temperate climate characterized by four distinct seasons: hot and humid summers, cold winters, and springs and falls with moderate temperatures. The annual rainfall ranges between 1000 mm to 1400mm and 1800mm for the central region and southern region, respectively (Jung et al., 2017; Alcantara and Ahn, 2020). During the summer, heavy rainfall from June to September leads to significant surface runoff, increases landslide risk, and causes approximately 95% of all landslides each year (Lee et al., 2020; Park and Lee, 2021). In addition, the landslides may be aggravated by typhoons, which mostly occur in August and September, and it is anticipated that frequency will increase due to climate change (Kim and Park, 2021). The rainfall trend analysis from 1971 to 2100 predicted the increase in rainfall of 271.23mm, which indicates the growing risk of landslides associated

with climate change (Lee, 2016). Temperature variations are influenced by its geographical location, the average summer temperatures range between 25 and 30°C, while winter temperatures can drop to -10°C in some parts of the country (Korea Meteorological Administration, 2020). The South Korean geologically is mainly composed of granitic and metamorphic rocks, such as gneiss, schist, and granite, which influence the stability of the landscape (Jung et al., 2024). The geomorphology is characterized by rugged mountains, river valleys, and coastal plains, with the Taebaek Mountains running along the eastern edge (Kim et al., 2020). In addition, the influence of rainfall, environmental, geomorphology, and geological factors increase the vulnerability to landslides across the country, especially in the northeastern mountainous region, as depicted in Figure 1.

The predominant soil types in South Korea include clay, sandy, and loamy soils, each with different characteristics affecting water infiltration, retention and erosion (Kang et al., 2022; Lee et al., 2023). Clay soils, being more stable, can become highly saturated, increasing landslide risk during heavy rains. On the other hand, sandy soils are more prone to shallow landslides due to fast saturation, leading to instability. Regions with steep topography and poorly consolidated soil (loose) are mostly at risk, especially after prolonged rainfalls (Kim et al., 2015).

Coastal areas are exposed to sea-level rise and coastal erosion, which can further complicate the landscape and increase landslide susceptibility. The combination of heavy summer rainfall, geological composition, and geomorphological factors makes South Korea particularly vulnerable to shallow landslides. Thus, continuous monitoring and research are vital to understand the complex interactions between climate, geology, soil types, and landslide occurrences in this region (Park, 2022). Understanding the combination of environmental, geological stability, and geomorphological features is crucial for developing effective disaster management strategies and enhancing public safety in landslide-prone areas. As climate change continues to impact rainfall patterns, South Korea faces ongoing challenges in mitigating landslide risks and protecting vulnerable communities.”

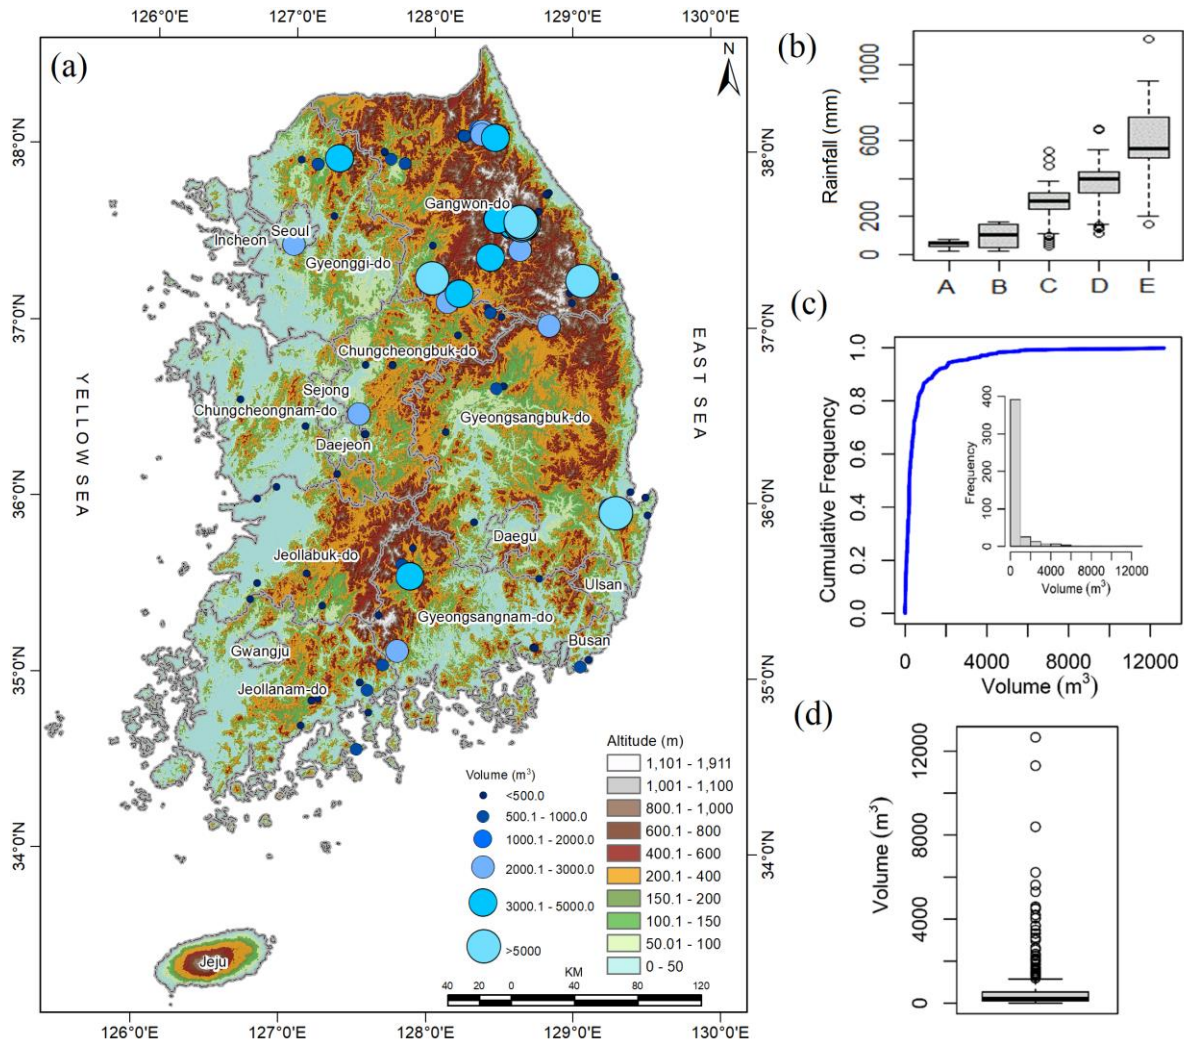

Figure 1. (a) Spatial distribution of landslides in South Korea, (b) temporal variation of rainfall, i.e., A: Maximum hourly rainfall, B: Four weeks rainfall, C: Three hours rainfall, D: Three days rainfall and E: Two weeks rainfall, (c) cumulative frequency distribution of volume of landslides and (d) box plot of volume of landslides.

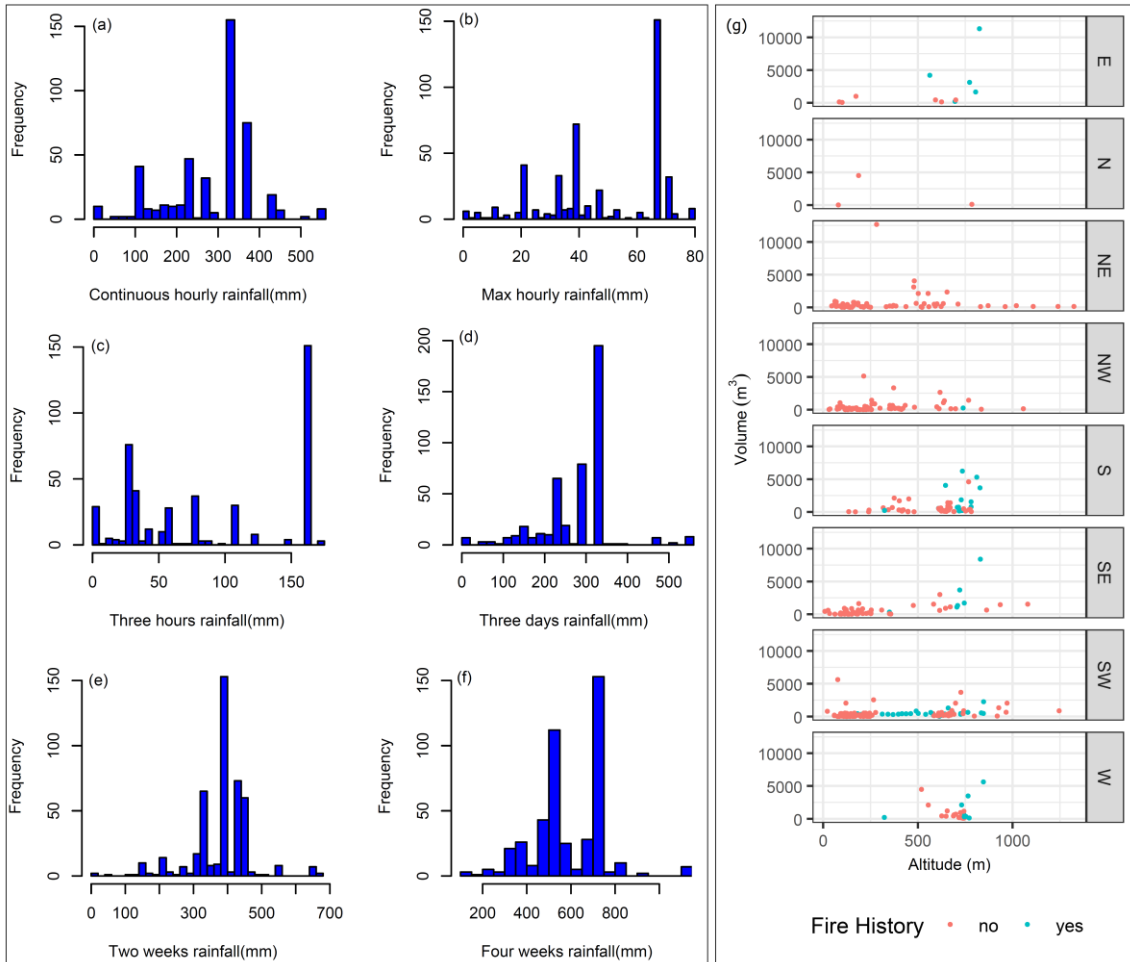

Figure 2. (a-f) Histograms of rainfall data, and (g) the scatter plot showing the variation of landslide volumes with respect to slope aspect, fire history and altitude.

Comment 4: Figure 2 needs to be updated. In the predictor variables, the authors should clearly specify which factors are influencing factors and which are triggering factors.

Response: Thank you for this observation. We agreed with the reviewer that the workflow had some missing information. Accordingly, the workflow figure was updated to reflect the reviewer's comment, and the model training and testing part was restructured to make it clearer. The updated Figure 3 (previously Figure 2 in the pre-print) is provided below,

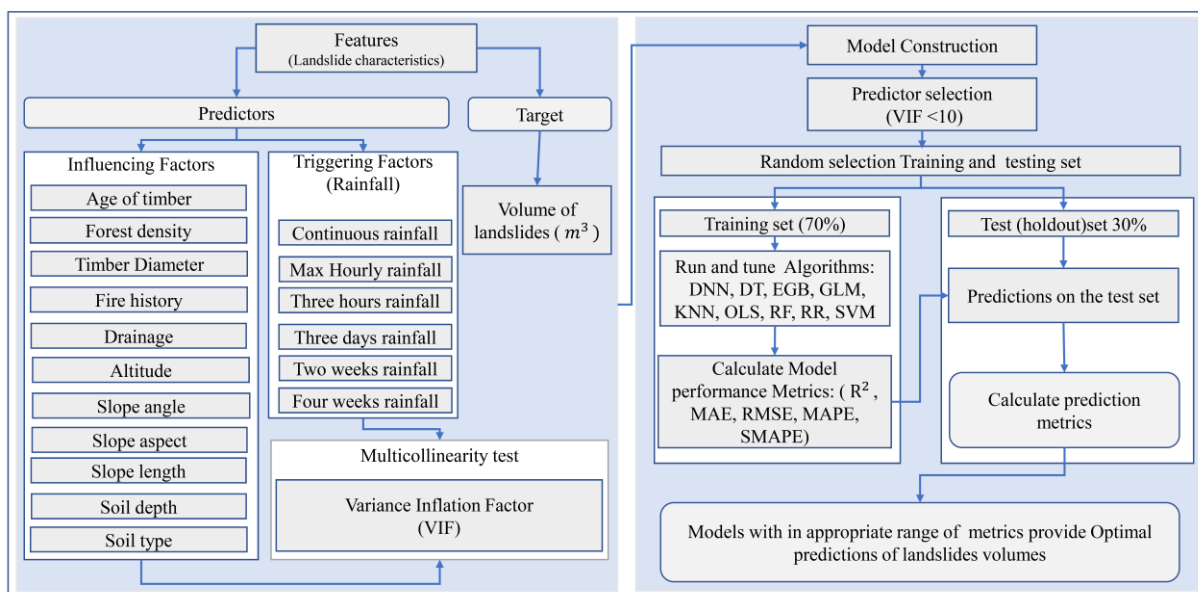

Figure 3. Workflow for the prediction of the volume of landslides due to rainfall.

Comment 5: A more detailed discussion of the input variables considered for volume prediction is required to better understand their roles as influencing and triggering factors. Additionally, the manuscript should provide further justification for the selection of these predictor variables.

Response: Thank you for your insightful comment. The details about the input variable are summarized in the data part of the manuscript, and Table 1 provides the reference justifying the reason for considering the stated feature as an input variable of the model. Accordingly, we have thoroughly revised section 2.2 (i.e., Data) in the revised manuscript as follows,

The landslide inventory dataset contains 450 landslide record information from 2011 to 2012, collected from different locations in South Korea by Korean Forest Services. This dataset tabulates information on landslide geometry, such as runout length, width, depth, and volume of the affected area, along with geomorphological composition, vegetation, and antecedent rainfall prior to landslide events. The details regarding landslide predisposing and triggering factors are summarized in Table 1.

Table 1. Landslide influencing and triggering factors.

| Group      | Features     | Description                                                                                                                      | Reference                                          |
|------------|--------------|----------------------------------------------------------------------------------------------------------------------------------|----------------------------------------------------|
| Vegetation | Fire history | The burning of the vegetation intensifies the mass movement of soil near the uncovered burned stem of trees and free movement on | Highland and Bobrowsky, 2008; Culler et al., 2021; |

| Group         | Features             | Description                                                                                                                                                                                                                                                                                                                                                                                                                                     | Reference                                                                                                   |
|---------------|----------------------|-------------------------------------------------------------------------------------------------------------------------------------------------------------------------------------------------------------------------------------------------------------------------------------------------------------------------------------------------------------------------------------------------------------------------------------------------|-------------------------------------------------------------------------------------------------------------|
| Geomorphology |                      | uncovered soil due to post-fire rainfall and storms. The sliding may also be due to loss of vegetation, altered soil property and structure, which lead to soil degradation and infiltration which increase pore pressure, and change in hydrology by concentrating water flow in places that exacerbate landslides.                                                                                                                            | Hyde et al., 2016;<br>Stoof et al., 2012                                                                    |
|               | Age of tree          | Mature forests have more resistance to shallow landslides due to highly developed roots, which improve soil cohesion and leaves that prevent direct contact of raindrops with the soil surface.                                                                                                                                                                                                                                                 | Sato et al., 2023;<br>Lann et al., 2024                                                                     |
|               | Forest density       | The presence of forest reduces the likelihood of landslides about three times compared to grassland. Grassland has been revealed to be three times more vulnerable to shallow landslides than broadleaf and, coniferous and in secondary forests.                                                                                                                                                                                               | Lann et al., 2024;<br>Greenwood et al., 2004; Turner et al., 2010; Scheidl et al., 2020; Asada et al., 2023 |
|               | Timber diameter (m)  | Tree spacing and size had been used to investigate the effect of root and tree in shallow landslide control. The high root density generally enhances slope stability, and specific tree placement and root sizes between 5 to 20 mm are effective in landslide prevention.                                                                                                                                                                     | Cohen and Schwarz., 2017;<br>Wang et al., 2016                                                              |
|               | Drainage             | The drainage has a significant effect on the slope stability and promotes the efficient control of the influence of rainfall on the ground water fluctuation. The presence of drainage increases the threshold of landslides due to rainfall.                                                                                                                                                                                                   | Yan et al., 2019;<br>Sun et al., 2010 ;<br>Wei et al., 2019 ;<br>Korup et al., 2007                         |
|               | Slope angle (degree) | The steeper slopes have lower presence of landslide due to low transportable materials. Slopes between 20-40 degrees are most vulnerable to greater landslides as rainfall intensity and duration increase. Here, we considered the average angle of the terrain at the landslide location, which provides valuable insight into the region's overall steepness and geomorphic characteristics, which are crucial factors influencing landslide | Duc, 2013 ; Qiu et al., 2016 ;<br>Donnarumma et al., 2013                                                   |

| Group    | Features                | Description                                                                                                                                                             | Reference                                                        |
|----------|-------------------------|-------------------------------------------------------------------------------------------------------------------------------------------------------------------------|------------------------------------------------------------------|
|          |                         | susceptibility and risk modeling.                                                                                                                                       |                                                                  |
|          | Slope aspect            | The effect of rainfall on slope differs by slope angle and slope aspect which lead to unevenly distributed occurrence of landslides.                                    | Panday and Dong, 2021; Cellek, 2021                              |
|          | Slope length (m)        | The volume increases as the slope length increases. There exists a complex interplay between rainfall, length of slope and slope angle on the occurrence of landslides. | Turner et al., 2010                                              |
|          | Soil depth (m)          | Soil properties, depth, and texture have significant differences in infiltration rates, which have different influences on the occurrence of landslides.                | Kitutu et al., 2009; McKenna et al., 2012                        |
|          | Soil type               | Higher rainfall intensity affects the occurrence of landslides differently, particularly in certain soil types that have shorter saturation and failure times.          | Liu et al., 2021                                                 |
| Location | Altitude                | Regional variability of elevation and mountain steepness affect the quantity of rainfall and associated landslides.                                                     | Hyun et al, 2010, Yoon and Bae, 2013; Park, 2015 Um et al., 2010 |
|          | Maximum hourly rainfall | The rainfall infiltrates the slope and increases pore water pressure that reduces soil shear strength, which leads to soil saturation that causes surface failure.      | Wieczorek, 1987; Smith et al., 2023; Dai and Lee, 2001           |
| Rainfall | Continuous rainfall     | Sudden intense rainfall concentrated in short periods of time is responsible for shallow landslide and debris flow.                                                     | Zhang et al., 2019                                               |
|          | Three hours rainfall    |                                                                                                                                                                         |                                                                  |
|          | Three days rainfall     | Ran et al., 2022<br>Zhang et al., 2019;                                                                                                                                 |                                                                  |
|          | Two weeks rainfall      | The antecedent rainfalls increase moisture in the soil and weaken soil cohesion.                                                                                        | Bernardie et al., 2014; Chen et al., 2015a; Gariano et al., 2017 |
|          | Four weeks rainfall     |                                                                                                                                                                         |                                                                  |

Location parameters such as altitude, latitude and longitude are essential elements that determine the microclimate of a given region, influencing rainfall patterns (Hyun et al., 2010; Yoon and Bae, 2013; Park, 2015). The northeastern region is characterized by high-elevation terrain, such as Taebaek, and Sobaek ranges, which dry air and lead to orographic precipitation

(Yun et al., 2009). The windward mountain versants receive a substantial amount of rainfall, which can increase the likelihood of landslides (Jin et al., 2022). This variation of rainfall with respect to the direction highlights the importance of including slope aspect variables in landslide studies (Kunz and Kottmeier, 2006). Figure 2(g) depicts the relationship between the slope aspect and the volume of landslides and slope aspect, altitude and fire history and shows that larger volumes were localized in regions that faced forest fire and altitudes between 500 and 1000m. Additionally, the topographical features such as slope length and slope angle affect the size of the landslide (Panday and Dong, 2021), slope failure due to over-saturation from groundwater and rainfall infiltration that destabilize the slope (Kafle et al., 2022). Furthermore, slope length, slope angle and slope aspect play an important role in the determination of the volume of geological material uprooted by landslides (Zaruba and Mencl, 2014; Khan et al., 2021). The slope stability depends on soil composition properties, including soil permeability indices that affect water infiltration and saturation level (Chen et al., 2015a). From surveyed regions, three main soil types, namely, sandy loam, loam, and silt loam, were observed, and their coefficient of permeability is 1.7, 1.65 and 1.5, respectively (Lee et al., 2013). Moreover, to reduce the infiltration drainage network that channeling rainwater terrain drains soil and reduces the saturation, which minimizes the likelihood of landslide occurrence as a result of groundwater discharge and rainfall water flow (Hovius et al., 1997; Wei et al., 2019). Furthermore, the vegetation protects the topsoil from the direct impact of raindrops hitting the ground, which causes erosion due to the force of gravity and reduces infiltration (Omwega, 1989; Keefer, 2000). The absence of vegetation allows rainwater to seep away fine topsoil, causing shallow landslides (Gonzalez-Ollauri and Mickovski, 2017). On the contrary, vegetation improves soil cohesion and prevents potential shallow landslides due to soil-root interaction (Gong et al., 2021; Phillips et al., 2021). The density of vegetation (forest) and leafage type (broad, pines or mixture) directly affects the quantity of raindrop intercepted and prevented from directly hitting the soil, which emphasizes the vegetation's landslides mitigation role. Further, the occurrence of forest fires can contribute to the occurrence of landslides due to the burning of vegetation covering the area, changing soil properties and increasing soil pH (Lee et al., 2013).

The rainfall, a triggering factor of landslides, is the immediate cause of slope instability and failure due to infiltration that leads to saturation resulting from increased pore water pressure that reduces soil shear strength (Yune et al., 2010; Khan et al., 2012; Kim et al., 2021; Lee et al., 2021). The antecedent rainfall increases the moisture in the soil, which accelerates

the soil saturation; the cumulative effect is essential to understand the saturation levels (Ran et al.,2022). In this study, rainfall variables are grouped based on time, namely, continuous rainfall, which is the accumulative value of rainfall on the day of a landslide from rainfall start hour to the landslide event, maximum hourly rainfall, rainfall during the fixed period such as three hours, one day, three days, two weeks etc.

Comment 6: I recommend providing clearer details on the geometry of the landslide inventory.

Response: Thank you for this recommendation. The landslide inventory provided by the Korea Forest Service (KFS) contains 455 landslide records (point locations) information from 2011 to 2012 within the triggering area. This dataset tabulates information on landslide geometry, such as runout length, width, depth, and volume of the affected area, along with geomorphological composition, vegetation, and antecedent rainfall prior to landslide events, which are integral to understanding the spatial extent and impact of each landslide. These geometric details have been incorporated into our analysis to represent landslide characteristics accurately. Accordingly, the data section has been revised in the updated manuscript as follows:

“The landslide inventory dataset contains 455 landslide record information from 2011 to 2012, collected from different locations in South Korea by Korean Forest Services. This dataset tabulates information on landslide geometry, such as runout length, width, depth, and volume of the affected area, along with geomorphological composition, vegetation, and antecedent rainfall prior to landslide events.”

Comment 7: A brief discussion on why nine data-driven models were chosen is recommended in the methods section. While these models have become quite common, providing a rationale for their selection will help justify their use in the study.

Response: Thank you for your valuable feedback. The inclusion of model selection is essential to justify the selection basis. In the present study, we aimed at predicting the volume of landslides using models that minimize error with interpretability and scalability. Since one model can not have all properties at the same time, we decided to select some of the models with those properties. The OLS, GLM, and DT were selected for their high interpretability, which helps to understand the influence of individual features on predictions (Gelman, 2007; Breiman, 2017). On the other hand, the EGB, RF, SVM, RR, and KNN were chosen due to

their robust performance in capturing complex patterns in data, which is essential for accurate predictions of landslide volumes (Chen and Guestrin, 2016; Liaw and Wiener, 2002; Hastie et al., 2009). Additionally, taking into account that the model will be used for regional scale, which will require the use of big data, the EGB, RF, DNN are designed to efficiently handle large datasets, making them suitable for the regional scale analysis. These last models can be scaled to incorporate more data from different geographical areas without significant adjustments, enhancing their applicability in future research (Krizhevsky et al., 2012).

Comment 8: The authors mainly use MAE and  $R^2$  for model validation. It is recommended to consider additional metrics commonly used in data-driven model evaluation. Relying solely on these two statistics may not comprehensively assess model performance.

Response: Thank you for your valuable suggestion. We have expanded the metrics used for model validation to provide a more comprehensive assessment of the model performance. In addition to Mean Absolute Error (MAE) and  $R^2$ , we have included additional metrics such as Root Mean Squared Error (RMSE), Mean Absolute Percentage Error (MAPE), and symmetric mean absolute percentage errors (SMAPE). These metrics will offer a broader perspective on the accuracy and reliability of our predictions. The updated section detailing the selected metrics is included in the revised manuscript as,

“The model performance evaluation is a process of quantifying the difference between the observed value not used in the modeling process and the predicted value by the model. Different metrics are applied depending on the type of task, whether it is a classification or a regression problem. Subsequently, the widely used evaluation metrics for regression models, namely,  $R^2$ , MAE, RMSE, MAPE and SMAPE, were utilized to evaluate the model performances. The metric formulae and evaluation criteria are summarized in Table 3.

**Table 3.** Model evaluation metrics.

| Metrics                                                           | Evaluation                                                                                                                                                                                                      | Reference                  |
|-------------------------------------------------------------------|-----------------------------------------------------------------------------------------------------------------------------------------------------------------------------------------------------------------|----------------------------|
| $RMSE$<br>$= \sqrt{\frac{1}{n} \sum_{i=1}^n (y_i - \hat{y}_i)^2}$ | <ul style="list-style-type: none"> <li>• Measures the square root of the average squared differences between predicted and actual values.</li> <li>• Lower values indicate better model performance.</li> </ul> | Hyndman and Koehler, 2006. |

|                                                                                     |                                                                                                                                                                                                                                                                                                                                                                                                                            |                                       |
|-------------------------------------------------------------------------------------|----------------------------------------------------------------------------------------------------------------------------------------------------------------------------------------------------------------------------------------------------------------------------------------------------------------------------------------------------------------------------------------------------------------------------|---------------------------------------|
| $MAE = \frac{1}{n} \sum_{i=1}^n  y_i - \hat{y}_i $                                  | <ul style="list-style-type: none"> <li>• The average of the absolute differences between predicted and actual values.</li> <li>• Lower values indicate better model performance.</li> </ul>                                                                                                                                                                                                                                | Willmott and Matsuura, 2005.          |
| $MAPE = \frac{100}{n} \sum_{i=1}^n \left  \frac{y_i - \hat{y}_i}{y_i} \right $      | <ul style="list-style-type: none"> <li>• Measures the accuracy of a model as a percentage, which can be more interpretable.</li> <li>• Lower values indicate better model performance.</li> </ul>                                                                                                                                                                                                                          | Armstrong, 2001.                      |
| $SMAPE = \frac{100}{n} \sum_{i=1}^n \frac{ y_i - \hat{y}_i }{ y_i  +  \hat{y}_i }$  | <ul style="list-style-type: none"> <li>• Unlike MAPE, which can be skewed by very small actual values, SMAPE accounts for both the actual and predicted values, making it symmetric.</li> <li>• SMAPE is expressed as a percentage</li> <li>• Mitigates the impact of small actual values on the error metric, providing a more balanced assessment.</li> <li>• Lower values indicate better model performance.</li> </ul> | Hyndman and Koehler, 2006             |
| $R^2 = 1 - \frac{\sum_{i=1}^n (y_i - \hat{y}_i)^2}{\sum_{i=1}^n (y_i - \bar{y})^2}$ | <ul style="list-style-type: none"> <li>• Represents the proportion of variance in the dependent variable that can be explained by the independent variables.</li> <li>• Values closer to 1 indicate a better fit</li> </ul>                                                                                                                                                                                                | Darlington, 1990; Chicco et al., 2021 |

\* $y_i$  and  $\hat{y}_i$  representing the actual and predicted value and,  $\bar{y}$  and  $n$  standing for the mean of actual value and number of observations in the dataset, respectively.

Comment 9: The summary of the various data-driven models (Table 3) indicates that the EGB model is the best-performing. However, the variable importance analysis shown in Figure 5 highlights only a subset of predictor variables, raising questions about whether different models utilize different sets of features. Further clarification is needed.

Response: We appreciate your insightful comment regarding the inconsistencies between the summary of the various data-driven models in Table 3 (now Table 4) and the variable importance analysis presented in Figure 5 (now Figure 6). In the earlier version of the manuscript, the variable importance features with a value of gain below 0.01 were removed from the plot. To avoid those inconsistencies and make clear all variables, the figure was updated and reflect all variables used in the updated manuscript depicted below,

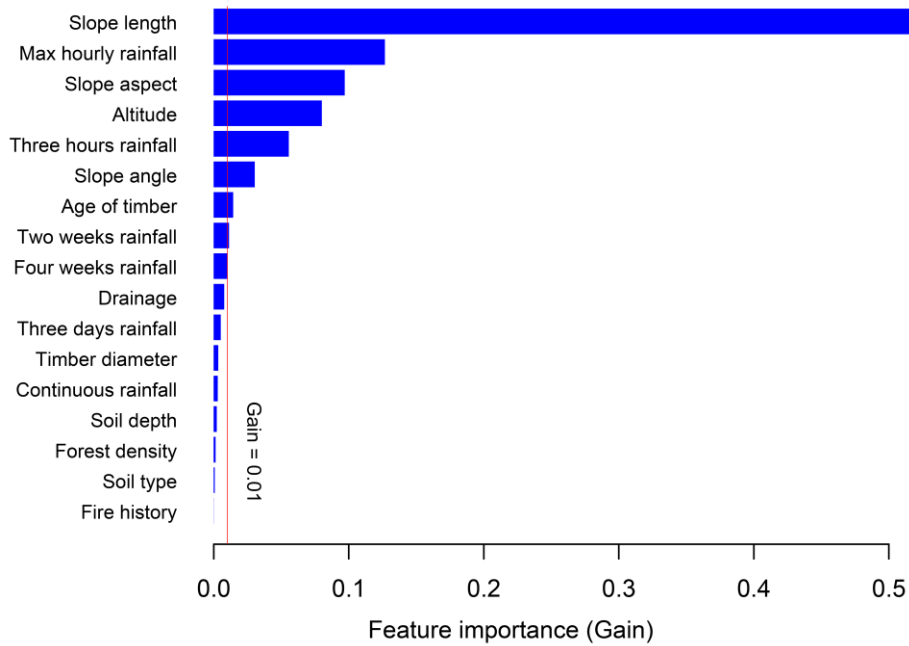

Figure 6. Variable importance for the EGB model.

### Specific Comments

Comment 1: Figure 1(b): The y-axis label is missing.

Response: We appreciate this observation that helped us to improve the clarity of Fig 1(b), which was missing the y-axis. We have corrected this oversight, and the updated Figure 1 now includes the y-axis label. Figure 1(b) illustrates the boxplot of various rainfall features utilized in the model. The revised figure is provided below,

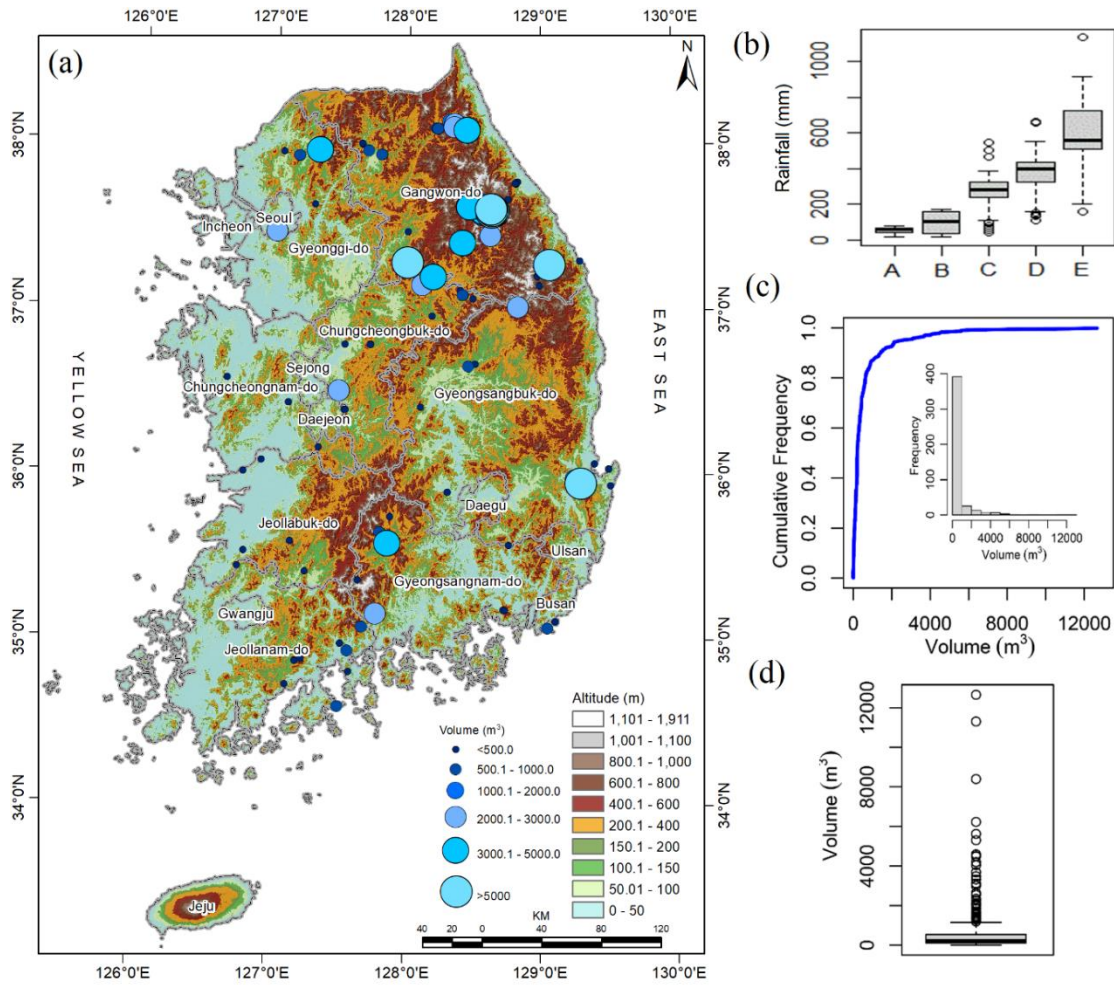

Figure 1. (a) Spatial distribution of landslides in South Korea, (b) temporal variation of rainfall, i.e., A: Maximum hourly rainfall, B: Four weeks rainfall, C: Three hours rainfall, D: Three days rainfall and E: Two weeks rainfall, (c) cumulative frequency distribution of volume of landslides and (d) box plot of volume of landslides.

Comment 2: In Figure 2, it would be better to use the terms ‘Training and Testing Algorithms’ instead of ‘Run and Test Algorithms’. This terminology more accurately reflects the standard processes involved in model development.

Response: Thank you for your insightful observation. Figure 2 (now Figure 3) has been updated in the revised manuscript as follows,

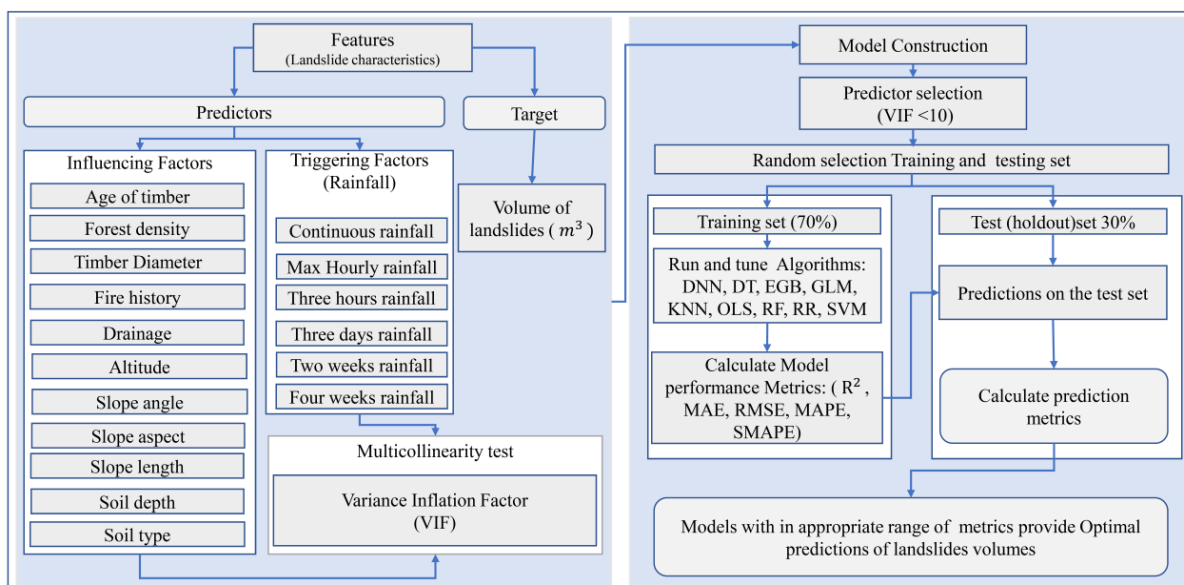

Figure 3. Workflow for the prediction of volume of landslides due to rainfall.

Comment 3: Line No. 104-107: I recommend that the authors use the acronyms for the different data-driven models here, as they have already been defined earlier in the manuscript. Consistent use of these acronyms throughout the manuscript will improve clarity and readability.

Response: We appreciate the comment regarding the consistency in the use of acronyms in the manuscript to keep the clarity. The suggested consistency in the use of acronyms was adopted in the updated manuscript.

Comment 4: Line No. 150-152: ‘Thus, planting vegetation is recommended as a better practice to improve soil cohesion and prevent potential landslides due to soil root interaction (Gong et al., 2017; Phillips et al., 2021)’. This is a recommendation, not a description. Please provide appropriate descriptions.

Response: Thank you for your comment. We understand the misuse of English connectives. The sentence was modified in the revised manuscript as follows,

“The absence of vegetation allows rainwater to seep away fine topsoil, causing shallow landslides (Gonzalez-Ollauri and Mickovski, 2017). On the contrary, vegetation improves soil cohesion and prevents potential shallow landslides due to soil-root interaction (Gong et al., 2021; Phillips et al., 2021).”

Comment 5: Why did the authors use 70% of the inventory and 30% for the validation? Why not 50% for each? The authors should state in the methods section why they used these percentages. Further, the authors need to clarify whether training and testing data were chosen randomly or if any specific criteria were used for the analysis.

Response: Thank you for your insightful suggestion. The training and testing were split randomly to train the model. The 10-fold cross-validation was performed to obtain an optimal model. This division aligns with common practices in machine learning, where a 70 (training): 30 (test) ratio is frequently used to ensure adequate training data while reserving a sufficient amount for model testing. In addition, Nguyen et al. (2021) also highlighted that 0.7/0.3 is the optimal split for the data.

Comment 6: Please review the references cited in the text, as there are frequent errors with the use of commas and semicolons between references. This issue occurs multiple times throughout the manuscript and needs correction for proper citation formatting.

Response: We thank you for pointing out the mis-references in the manuscript. We understand the concern regarding improper citations, and we carefully read and corrected all misreferencing.

Comment 7: Chen et al. (2015) is not cited correctly in the text. There are two different articles by Chen et al. (2015) listed in the references section. The authors need to distinguish between these references by specifying them as Chen et al. (2015a) and Chen et al. (2015b). The reference section and citation in the text should be updated accordingly to reflect these distinctions.

Response: We appreciate the observation regarding the two authors with the same name, and the correction has been done accordingly, as follows,

Chen, Z., Luo, R., Huang, Z., Tu, W., Chen, J., Li, W., ... and Ai, Y. (2015a). Effects of different backfill soils on artificial soil quality for cut slope revegetation: Soil structure, soil erosion, moisture retention and soil C stock. *Ecological engineering*, 83, 5-12.

Chen, T., He, T., Benesty, M., Khotilovich, V., Tang, Y., Cho, H., ... and Zhou, T. (2015b). Xgboost: extreme gradient boosting. *R package version 0.4-2*, 1(4), 1-4.

Comment 8: Line 133 cites (Kafle, 2022), but this article is either missing from the reference

section or is not cited correctly. Please verify and ensure that this reference is properly included and formatted in the reference section.

Response: The citation was mis-referenced. The citation has been corrected to "Kafle et al. (2022)" and is now properly included and formatted in the reference section of the revised manuscript.

Kafle, L., Xu, W. J., Zeng, S. Y., & Nagel, T. (2022). A numerical investigation of slope stability influenced by the combined effects of reservoir water level fluctuations and precipitation: A case study of the Bianjiazhai landslide in China. *Engineering Geology*, 297, 106508.

Comment 9: Line no 215: Chowdhury (2023)- article not present in the reference section or not mentioned in the correct form.

Response: Thank you for your comment. The reference has been updated to "Chowdhury et al. (2023)" in the revised manuscript, and it is now correctly included in the reference section as follows,

Chowdhury, M. Z. I., Leung, A. A., Walker, R. L., Sikdar, K. C., O'Beirne, M., Quan, H., and Turin, T. C. (2023). A comparison of machine learning algorithms and traditional regression-based statistical modeling for predicting hypertension incidence in a Canadian population. *Scientific Reports*, 13(1), 13.

Comment 10: Line no 236: (Team, 2022)- article is not present in the reference section or not mentioned in the correct form.

Response: Thank you for pointing out the citation issue. The reference has been corrected to "R Core Team (2022)" in the revised manuscript. The updated reference is provided below:

“R core Team (2022). R: A language and environment for statistical computing. R Foundation for Statistical Computing, Vienna, Austria. URL: <<https://www.R-project.org/>>.”

Comment 11: Line no 239: Jerome et al. (2012)- article not present in the reference section or not mentioned in the correct form.

Response: We appreciate your observation regarding the mis-reference in line 239 of the

manuscript concerning Jerome et al. (2012). The reference was updated as “Jerome et al. (2010)” in the updated manuscript. The updated citation is as follows,

Friedman, J. H., Hastie, T., & Tibshirani, R. (2010). Regularization paths for generalized linear models via coordinate descent. *Journal of statistical software*, 33, 1-22. URL:<<https://www.jstatsoft.org/v33/i01/>>.”

Comment 12: Please verify the unit of soil depth. Most landslide inventories presented in Table 2 and Figure 1(d) suggest that the landslides are shallow-seated based on their volume distributions; the unit of soil depth does not seem to align with this observation.

Response: We thank the reviewer for highlighting the mistake in the soil depth unit. The correct unit for soil depth is centimeters (cm). However, for consistency and clarity, we have transformed the soil depth data into meters (m) and updated the manuscript accordingly.

Comment 13: I suggest adding a few lines in the discussion section to highlight the practical applicability of the proposed model. This would provide insight into how the model can be used in real-world scenarios and its potential impact on practice or policy.

Response: Thank you for your suggestion regarding the practical applicability of our proposed model. In the revised discussion section, we included a few lines highlighting how the model can be utilized in real-world scenarios.

We emphasized that the model’s ability to accurately predict landslide volumes can aid in disaster risk management by providing timely information for early warning systems. Additionally, the insights gained from the model can inform land-use planning and policy decisions, allowing stakeholders to identify high-risk areas and implement mitigation strategies effectively. By integrating the model into existing monitoring frameworks, agencies can enhance their response capabilities and better allocate resources during heavy rainfall events.

## References

- Alcantara, A. L., and Ahn, K. H. (2020). Probability distribution and characterization of daily precipitation related to tropical cyclones over the Korean Peninsula. *Water*, 12(4), 1214.
- Alcántara-Ayala, I. (2021). Integrated landslide disaster risk management (ILDRiM): the challenge to avoid the construction of new disaster risk. *Environmental Hazards*, 20(3), 323-344.

- Alcántara-Ayala, I., & Sassa, K. (2023). Landslide risk management: from hazard to disaster risk reduction. *Landslides*, 20(10), 2031-2037.
- Amatya, S. C. (2016). Landslide disaster management in Nepal: a near-future perspective. Nepal-Japan Friendship Association of Water Induced Disaster (NFAD), Japan Department of Water Induced Disaster Management (DWIDM).
- Armstrong, J. S. (2001). Combining forecasts (pp. 417-439). Springer US.
- Asada, H., & Minagawa, T. (2023). Impact of vegetation differences on shallow landslides: a case study in Aso, Japan. *Water*, 15(18), 3193.
- Barik, M. G., Adam, J. C., Barber, M. E., & Muhunthan, B. (2017). Improved landslide susceptibility prediction for sustainable forest management in an altered climate. *Engineering geology*, 230, 104-117.
- Bernardie, S., Desramaut, N., Malet, J.-P., Gourlay, M., and Grandjean, G. (2014). Prediction of changes in landslide rates induced by rainfall. *Landslides*, 12(3), 481–494. doi:10.1007/s10346-014-0495-8
- Breiman, L. (2017). Classification and regression trees. Routledge.
- Cellek, S. (2021). The effect of aspect on landslide and its relationship with other parameters. In *Landslides*. IntechOpen.
- Chang, K. T., and Chiang, S. H. (2009). An integrated model for predicting rainfall-induced landslides. *Geomorphology*, 105(3-4), 366-373.
- Chatra, A. S., Dodagoudar, G. R., & Maji, V. B. (2019). Numerical modelling of rainfall effects on the stability of soil slopes. *International Journal of Geotechnical Engineering*.
- Chen, C. W., Oguchi, T., Hayakawa, Y. S., Saito, H., and Chen, H. (2017). Relationship between landslide size and rainfall conditions in Taiwan. *Landslides*, 14, 1235-1240.
- Chen, L., Guo, Z., Yin, K., Shrestha, D. P., & Jin, S. (2019). The influence of land use and land cover change on landslide susceptibility: a case study in Zhushan Town, Xuan'en County (Hubei, China). *Natural hazards and earth system sciences*, 19(10), 2207-2228.
- Chen, T., & Guestrin, C. (2016). Xgboost: A scalable tree boosting system. In *Proceedings of the 22nd acm sigkdd international conference on knowledge discovery and data mining* (pp. 785-794).
- Chen, X., Zhang, L., Zhang, L., Zhou, Y., Ye, G., & Guo, N. (2021). Modelling rainfall-induced landslides from initiation of instability to post-failure. *Computers and geotechnics*, 129, 103877.
- Chen, Z., Luo, R., Huang, Z., Tu, W., Chen, J., Li, W., ... and Ai, Y. (2015a). Effects of different backfill soils on artificial soil quality for cut slope revegetation: Soil structure, soil erosion, moisture retention and soil C stock. *Ecological engineering*, 83, 5-12.
- Cheung, R. W. (2021). Landslide risk management in Hong Kong. *Landslides*, 18(10), 3457-3473.
- Chicco, D., Warrens, M. J., & Jurman, G. (2021). The coefficient of determination R-squared is more informative than SMAPE, MAE, MAPE, MSE and RMSE in regression analysis evaluation. *Peerj computer science*, 7, e623.
- Cohen, D., & Schwarz, M. (2017). Tree-root control of shallow landslides. *Earth Surface Dynamics*, 5(3), 451-477.

- Conte, E., Pugliese, L., and Troncone, A. (2022). A simple method for predicting rainfall-induced shallow landslides. *Journal of Geotechnical and Geoenvironmental Engineering*, 148(10), 04022079
- Culler, E. S., Livneh, B., Rajagopalan, B., & Tiampo, K. F. (2021). A data-driven evaluation of post-fire landslide susceptibility. *Natural Hazards and Earth System Sciences Discussions*, 2021, 1-24. <https://doi.org/10.5194/nhess-23-1631-2023>
- Dai, F. C., & Lee, C. F. (2001). Frequency–volume relation and prediction of rainfall-induced landslides. *Engineering geology*, 59(3-4), 253-266.
- Dai, F. C., Lee, C. F., & Ngai, Y. Y. (2002). Landslide risk assessment and management: an overview. *Engineering geology*, 64(1), 65-87.
- Dai, K., Xu, Q., Li, Z., Tomás, R., Fan, X., Dong, X., ... and Ran, P. (2019). Post-disaster assessment of 2017 catastrophic Xinmo landslide (China) by spaceborne SAR interferometry. *Landslides*, 16, 1189-1199.
- Darlington, R. B. (1990). *Regression and linear models*. McGraw-Hill College.
- Dikshit, A., Satyam, N., & Pradhan, B., 2019. Estimation of rainfall-induced landslides using the TRIGRS model. *Earth Systems and Environment*, 3, 575-584.
- Donnarumma, A., Revellino, P., Grelle, G., and Guadagno, F. M. (2013). Slope angle as indicator parameter of landslide susceptibility in a geologically complex area. *Landslide Science and Practice: Volume 1: Landslide Inventory and Susceptibility and Hazard Zoning*, 425-433.
- Duc, D. M. (2013). Rainfall-triggered large landslides on 15 December 2005 in Van Canh district, Binh Dinh province, Vietnam. *Landslides*, 10(2), 219-230.
- Evans, S. G., Mugnozsa, G. S., Strom, A., and Hermanns, R. L. (Eds.). (2007). *Landslides from massive rock slope failure (Vol. 49)*. Springer Science and Business Media.
- Fan, X., Xu, Q., Liu, J., Subramanian, S. S., He, C., Zhu, X., & Zhou, L. (2019). Successful early warning and emergency response of a disastrous rockslide in Guizhou province, China. *Landslides*, 16, 2445-2457.
- Fan, X., Xu, Q., Scaringi, G., Dai, L., Li, W., Dong, X., ... & Havenith, H. B. (2017). Failure mechanism and kinematics of the deadly June 24th 2017 Xinmo landslide, Maoxian, Sichuan, China. *Landslides*, 14, 2129-2146. <https://doi.org/10.1007/s10346-017-0907-7>
- Gariano, S. L., Rianna, G., Petrucci, O., and Guzzetti, F. (2017). Assessing future changes in the occurrence of rainfall-induced landslides at a regional scale. *Science of the total environment*, 596, 417-426.
- Gelman, A. (2007). *Data analysis using regression and multilevel/hierarchical models*. Cambridge University Press.
- Gong, Q., Wang, J., Zhou, P., and Guo, M. (2021). A regional landslide stability analysis method under the combined impact of rainfall and vegetation roots in south China. *Advances in Civil Engineering*, 2021, 1-12.
- Gonzalez-Ollauri, A., and Mickovski, S. B. (2017). Hydrological effect of vegetation against rainfall-induced landslides. *Journal of Hydrology*, 549, 374-387.
- Greenwood, J. R., Norris, J. E., & Wint, J. (2004). Assessing the contribution of vegetation to slope stability. *Proceedings of the Institution of Civil Engineers-Geotechnical*

- Engineering, 157(4), 199-207.
- Gutierrez-Martin, A. (2020). A GIS-physically-based emergency methodology for predicting rainfall-induced shallow landslide zonation. *Geomorphology*, 359, 107121.
- Guzzetti, F., Peruccacci, S., Rossi, M., & Stark, C. P. (2008). The rainfall intensity–duration control of shallow landslides and debris flows: an update. *Landslides*, 5, 3-17.
- Hastie, T. (2009). *The elements of statistical learning: data mining, inference, and prediction*.
- Highland, L. and Bobrowsky, P. (2008). *The Landslide Handbook: A Guide to Understanding Landslides*, United States Geological Survey, Reston, VA, Circular 1325, <https://pubs.usgs.gov/circ/1325/> (last access: 6 March 2023), 2008.
- Holcombe, E. A., Beesley, M. E., Vardanega, P. J., & Sorbie, R. (2016, March). Urbanisation and landslides: hazard drivers and better practices. In *Proceedings of the Institution of Civil Engineers-Civil Engineering* (Vol. 169, No. 3, pp. 137-144). Thomas Telford Ltd.
- Hovius, N., Stark, C. P., & Allen, P. A. (1997). Sediment flux from a mountain belt derived by landslide mapping. *Geology*, 25(3), 231-234.
- Hyde, K. D., Riley, K., & Stoof, C. (2016). Uncertainties in predicting debris flow hazards following wildfire. *Natural haz*
- Hyndman, R. J., & Koehler, A. B. (2006). Another look at measures of forecast accuracy. *International journal of forecasting*, 22(4), 679-688.
- Hyun, Y. K., Kar, S. K., Ha, K. J., & Lee, J. H. (2010). Diurnal and spatial variabilities of monsoonal CG lightning and precipitation and their association with the synoptic weather conditions over South Korea. *Theoretical and applied climatology*, 102, 43-60.
- Intrieri, E., Carlà, T., and Gigli, G. (2019). Forecasting the time of failure of landslides at slope-scale: A literature review. *Earth-science reviews*, 193, 333-349.
- Islam, M. A., Islam, M. S., & Islam, T. (2017, September). Landslides in Chittagong hill tracts and possible measures. In *Proceedings of the international conference on disaster risk mitigation, Dhaka, Bangladesh* (Vol. 23).
- Jin, H. G., Lee, H., & Baik, J. J. (2022). Characteristics and possible mechanisms of diurnal variation of summertime precipitation in South Korea. *Theoretical and Applied Climatology*, 148(1), 551-568.
- Ju, L. Y., Zhang, L. M., and Xiao, T. (2023). Power laws for accurate determination of landslide volume based on high-resolution LiDAR data. *Engineering Geology*, 312, 106935.
- Jung, M. J., Jeong, Y. J., Shin, W. J., & Cheong, A. C. S. (2024). Isotopic distribution of bioavailable Sr, Nd, and Pb in Chungcheongbuk-do Province, Korea. *Journal of Analytical Science and Technology*, 15(1), 46.
- Jung, Y., Shin, J. Y., Ahn, H., and Heo, J. H. (2017). The spatial and temporal structure of extreme rainfall trends in South Korea. *Water*, 9(10), 809.
- Kafle, L., Xu, W. J., Zeng, S. Y., & Nagel, T. (2022). A numerical investigation of slope stability influenced by the combined effects of reservoir water level fluctuations and precipitation: A case study of the Bianjiazhai landslide in China. *Engineering Geology*, 297, 106508.
- Kang, M. W., Yibeltal, M., Kim, Y. H., Oh, S. J., Lee, J. C., Kwon, E. E., & Lee, S. S. (2022).

- Enhancement of soil physical properties and soil water retention with biochar-based soil amendments. *Science of the total environment*, 836, 155746.
- Keefer, R. F. (2000). *Handbook of soils for landscape architects*. Oxford University Press.
- Khan, M. A., Basharat, M., Riaz, M. T., Sarfraz, Y., Farooq, M., Khan, A. Y., ... and Shahzad, A. (2021). An integrated geotechnical and geophysical investigation of a catastrophic landslide in the Northeast Himalayas of Pakistan. *Geological Journal*, 56(9), 4760-4778
- Khan, Y. A., Lateh, H., Baten, M. A., and Kamil, A. A. (2012). Critical antecedent rainfall conditions for shallow landslides in Chittagong City of Bangladesh. *Environmental Earth Sciences*, 67, 97-106.
- Kim, D. E., Seong, Y. B., Weber, J., & Yu, B. Y. (2020). Unsteady migration of Taebaek Mountain drainage divide, Cenozoic extensional basin margin, Korean Peninsula. *Geomorphology*, 352, 107012.
- Kim, H. G., & Park, C. Y. (2021). Landslide susceptibility analysis of photovoltaic power stations in Gangwon-do, Republic of Korea. *Geomatics, Natural Hazards and Risk*, 12(1), 2328-2351.
- Kim, J., Lee, K., Jeong, S., & Kim, G. (2014). GIS-based prediction method of landslide susceptibility using a rainfall infiltration-groundwater flow model. *Engineering geology*, 182, 63-78.
- Kim, M. S., Onda, Y., Kim, J. K., & Kim, S. W. (2015). Effect of topography and soil parameterisation representing soil thicknesses on shallow landslide modelling. *Quaternary International*, 384, 91-106.
- Kim, S. W., Chun, K. W., Kim, M., Catani, F., Choi, B., and Seo, J. I. (2021). Effect of antecedent rainfall conditions and their variations on shallow landslide-triggering rainfall thresholds in South Korea. *Landslides*, 18, 569-582.
- Kitutu, M. G., Muwanga, A., Poesen, J., and Deckers, J. A. (2009). Influence of soil properties on landslide occurrences in Bududa district, Eastern Uganda. *African journal of agricultural research*, 4(7), 611-620.
- Klimeš, J., Stemberk, J., Blahut, J., Krejčí, V., Krejčí, O., Hartvich, F., & Kycl, P. (2017). Challenges for landslide hazard and risk management in 'low-risk' regions, Czech Republic—landslide occurrences and related costs (IPL project no. 197). *Landslides*, 14, 771-780
- Korup, O., Clague, J. J., Hermanns, R. L., Hewitt, K., Strom, A. L., and Weidinger, J. T. (2007). Giant landslides, topography, and erosion. *Earth and Planetary Science Letters*, 261(3-4), 578-589.
- Krizhevsky, A., Sutskever, I., & Hinton, G. E. (2012). Imagenet classification with deep convolutional neural networks. *Advances in neural information processing systems*, 25.
- Kunz, M., & Kottmeier, C. (2006). Orographic enhancement of precipitation over low mountain ranges. Part II: Simulations of heavy precipitation events over southwest Germany. *Journal of applied meteorology and climatology*, 45(8), 1041-1055.
- Lacerda, W. A., Palmeira, E. M., Netto, A. L. C., & Ehrlich, M. (Eds.). (2014). *Extreme rainfall induced landslides: an international perspective*. Oficina de Textos.

- Lann, T., Bao, H., Lan, H., Zheng, H., & Yan, C. (2024). Hydro-mechanical effects of vegetation on slope stability: A review. *Science of the Total Environment*, 171691.
- Lee, D. B., Kim, Y. N., Sonn, Y. K., & Kim, K. H. (2023). Comparison of Soil Taxonomy (2022) and WRB (2022) Systems for classifying Paddy Soils with different drainage grades in South Korea. *Land*, 12(6), 1204.
- Lee, D. H., Cheon, E., Lim, H. H., Choi, S. K., Kim, Y. T., & Lee, S. R. (2021). An artificial neural network model to predict debris-flow volumes caused by extreme rainfall in the central region of South Korea. *Engineering Geology*, 281, 105979.
- Lee, D. H., Cheon, E., Lim, H. H., Choi, S. K., Kim, Y. T., and Lee, S. R. (2021). An artificial neural network model to predict debris-flow volumes caused by extreme rainfall in the central region of South Korea. *Engineering Geology*, 281, 105979.
- Lee, D. H., Kim, Y. T., and Lee, S. R. (2020). Shallow landslide susceptibility models based on artificial neural networks considering the factor selection method and various non-linear activation functions. *Remote Sensing*, 12(7), 1194.
- Lee, J. U., Cho, Y. C., Kim, M., Jang, S. J., Lee, J., & Kim, S. (2022). The effects of different geological conditions on landslide-triggering rainfall conditions in South Korea. *Water*, 14(13), 2051.
- Lee, M. J. (2016). Rainfall and landslide correlation analysis and prediction of future rainfall base on climate change. In *Geohazards Caused by Human Activity*. IntechOpen.
- Lee, S. G. (2009). The Effects of Landslide in South Korea and Some Issues for Successful Management and Mitigation. *한국토양비료학회 학술발표회 초록집*, 181-191.
- Lee, S. W., Kim, G., Yune, C. Y., and Ryu, H. J. (2013). Development of landslide-risk assessment model for mountainous regions in eastern Korea. *Disaster advances*, 6(6), 70-79.
- Li, B. V., Jenkins, C. N., & Xu, W. (2022a). Strategic protection of landslide vulnerable mountains for biodiversity conservation under land-cover and climate change impacts. *Proceedings of the National Academy of Sciences*, 119(2), e2113416118.
- Li, C. J., Guo, C. X., Yang, X. G., Li, H. B., & Zhou, J. W. (2022b). A GIS-based probabilistic analysis model for rainfall-induced shallow landslides in mountainous areas. *Environmental Earth Sciences*, 81(17), 432.
- Liaw, A., & Wiener, M. (2002). Classification and regression by randomForest. *R news*.
- Liu, Y., Deng, Z., & Wang, X. (2021). The effects of rainfall, soil type and slope on the processes and mechanisms of rainfall-induced shallow landslides. *Applied Sciences*, 11(24), 11652.
- Luino, F., De Graff, J., Biddoccu, M., Faccini, F., Freppaz, M., Roccati, A., ... & Turconi, L. (2022). The Role of soil type in triggering shallow landslides in the alps (Lombardy, Northern Italy). *Land*, 11(8), 1125.
- Lusiana, N., Shinohara, Y., & Imaizumi, F. (2024). Quantifying effects of changes in forest age distribution on the landslide frequency in Japan. *Natural Hazards*, 1-20.
- Martinović, K., Gavin, K., Reale, C., and Mangan, C. (2018). Rainfall thresholds as a landslide indicator for engineered slopes on the Irish Rail network. *Geomorphology*, 306, 40-50.

- Mateos, R. M., López-Vinielles, J., Poyiadji, E., Tsagkas, D., Sheehy, M., Hadjicharalambous, K., ... & Herrera, G. (2020). Integration of landslide hazard into urban planning across Europe. *Landscape and urban planning*, 196, 103740.
- McKenna, J. P., Santi, P. M., Amblard, X., and Negri, J. (2012). Effects of soil-engineering properties on the failure mode of shallow landslides. *Landslides*, 9, 215-228.
- Nguyen, Q. H., Ly, H. B., Ho, L. S., Al-Ansari, N., Le, H. V., Tran, V. Q., ... & Pham, B. T. (2021). Influence of data splitting on performance of machine learning models in prediction of shear strength of soil. *Mathematical Problems in Engineering*, 2021(1), 4832864.
- Omwega, A. K. (1989). Crop cover, rainfall energy and soil erosion in Githunguri (Kiambu District), Kenya. The University of Manchester (United Kingdom).
- Panday, S., & Dong, J. J. (2021). Topographical features of rainfall-triggered landslides in Mon State, Myanmar, August 2019: Spatial distribution heterogeneity and uncommon large relative heights. *Landslides*, 18(12), 3875-3889.
- Park, C. Y. (2015). The classification of extreme climate events in the Republic of Korea. *Journal of the Korean association of regional geographers*, 21(2), 394-410.
- Park, S. J., & Lee, D. K. (2021). Predicting susceptibility to landslides under climate change impacts in metropolitan areas of South Korea using machine learning. *Geomatics, Natural Hazards and Risk*, 12(1), 2462-2476.
- Park, S.J. (2022). Assessment of disaster risks induced by climate change, using machine learning techniques (Doctoral dissertation, 서울대학교 대학원).
- Paudel, P. P., Omura, H., Kubota, T., and Morita, K. (2003). Landslide damage and disaster management system in Nepal. *Disaster Prevention and Management: An International Journal*, 12(5), 413-419.
- Phillips, C., Hales, T., Smith, H., and Basher, L. (2021). Shallow landslides and vegetation at the catchment scale: A perspective. *Ecological Engineering*, 173, 106436.
- Pradhan, S., Toll, D. G., Rosser, N. J., & Brain, M. J. (2022). An investigation of the combined effect of rainfall and road cut on landsliding. *Engineering Geology*, 307, 106787. <https://doi.org/10.1016/j.enggeo.2022.106787>
- Qiu, H., Regmi, A. D., Cui, P., Cao, M., Lee, J., and Zhu, X. (2016). Size distribution of loess slides in relation to local slope height within different slope morphologies. *Catena*, 145, 155-163.
- Rahman, M. S., Ahmed, B., & Di, L. (2017). Landslide initiation and runout susceptibility modeling in the context of hill cutting and rapid urbanization: a combined approach of weights of evidence and spatial multi-criteria. *Journal of Mountain Science*, 14(10), 1919-1937.
- Ran, Q., Wang, J., Chen, X., Liu, L., Li, J., & Ye, S. (2022). The relative importance of antecedent soil moisture and precipitation in flood generation in the middle and lower Yangtze River basin. *Hydrology and Earth System Sciences*, 26(19), 4919-4931.
- Razakova, M., Kuzmin, A., Fedorov, I., Yergaliev, R., and Ainakulov, Z. (2020). Methods of calculating landslide volume using remote sensing data. In *E3S Web of Conferences* (Vol. 149, p. 02009). EDP Sciences.

- Rosi, A., Peternel, T., Jemec-Auflič, M., Komac, M., Segoni, S., and Casagli, N. (2016). Rainfall thresholds for rainfall-induced landslides in Slovenia. *Landslides*, 13, 1571-1577.
- Rotaru, A., Oajdea, D., and Răileanu, P. (2007). Analysis of the landslide movements. *International journal of geology*, 1(3), 70-79.
- Saito, H., Korup, O., Uchida, T., Hayashi, S., & Oguchi, T. (2014). Rainfall conditions, typhoon frequency, and contemporary landslide erosion in Japan. *Geology*, 42(11), 999-1002.
- Sato, T., Katsuki, Y., & Shuin, Y. (2023). Evaluation of influences of forest cover change on landslides by comparing rainfall-induced landslides in Japanese artificial forests with different ages. *Scientific reports*, 13(1), 14258.
- Scheidl, C., Heiser, M., Kamper, S., Thaler, T., Klebinder, K., Nagl, F., ... and Seidl, R. (2020). The influence of climate change and canopy disturbances on landslide susceptibility in headwater catchments. *Science of the total environment*, 742, 140588.
- Smith, H. G., Neverman, A. J., Betts, H., & Spiekermann, R. (2023). The influence of spatial patterns in rainfall on shallow landslides. *Geomorphology*, 437, 108795.
- Spiker, E. C., & Gori, P. (2003). National landslide hazards mitigation strategy, a framework for loss reduction (No. 1244). US Geological Survey.
- Stoof, C. R., Vervoort, R. W., Iwema, J., Van Den Elsen, E., Ferreira, A. J. D., & Ritsema, C. J. (2012). Hydrological response of a small catchment burned by experimental fire. *Hydrology and Earth System Sciences*, 16(2), 267-285.
- Sun, H. Y., Wong, L. N. Y., Shang, Y. Q., Shen, Y. J., and Lü, Q. (2010). Evaluation of drainage tunnel effectiveness in landslide control. *Landslides*, 7, 445-454.
- Tacconi Stefanelli, C., Casagli, N., & Catani, F. (2020). Landslide damming hazard susceptibility maps: a new GIS-based procedure for risk management. *Landslides*, 17, 1635-1648.
- Tsai, T. L., & Chen, H. F. (2010). Effects of degree of saturation on shallow landslides triggered by rainfall. *Environmental Earth Sciences*, 59, 1285-1295.
- Turner, T. R., Duke, S. D., Fransen, B. R., Reiter, M. L., Kroll, A. J., Ward, J. W., ... & Bilby, R. E. (2010). Landslide densities associated with rainfall, stand age, and topography on forested landscapes, southwestern Washington, USA. *Forest Ecology and Management*, 259(12), 2233-2247.
- Um, M. J., Yun, H., Cho, W., & Heo, J. H. (2010). Analysis of orographic precipitation on Jeju Island using regional frequency analysis and regression. *Water resources management*, 24, 1461-1487.
- Van Tien, P., Luong, L. H., Duc, D. M., Trinh, P. T., Quynh, D. T., Lan, N. C., ... & Loi, D. H. (2021). Rainfall-induced catastrophic landslide in Quang Tri Province: the deadliest single landslide event in Vietnam in 2020.
- Wang, D., Hollaus, M., Schmaltz, E., Wieser, M., Reifeltshammer, D., & Pfeifer, N. (2016). Tree stem shapes derived from TLS data as an indicator for shallow landslides. *Procedia Earth and Planetary Science*, 16, 185-194.
- Wei, Z. L., Shang, Y. Q., Sun, H. Y., Xu, H. D., and Wang, D. F. (2019). The effectiveness of a drainage tunnel in increasing the rainfall threshold of a deep-seated landslide. *Landslides*, 16, 1731-1744.

- Wieczorek, G. (1987). In central Santa Cruz Mountains, California. Debris flows/avalanches: process, recognition, and mitigation, 7, 93.
- Willmott, C. J., & Matsuura, K. (2005). Advantages of the mean absolute error (MAE) over the root mean square error (RMSE) in assessing average model performance. *Climate research*, 30(1), 79-82.
- Winter, M. G., & Bromhead, E. N. (2012). Landslide risk: some issues that determine societal acceptance. *Natural Hazards*, 62, 169-187.
- Yan, L., Xu, W., Wang, H., Wang, R., Meng, Q., Yu, J., and Xie, W. C. (2019). Drainage controls on the Donglingxing landslide (China) induced by rainfall and fluctuation in reservoir water levels. *Landslides*, 16, 1583-1593.
- Yang, H., & Adler, R. F. (2008). Predicting global landslide spatiotemporal distribution: integrating landslide susceptibility zoning techniques and real-time satellite rainfall estimates. *International Journal of Sediment Research*, 23(3), 249-257.
- Yoon, S. S., & Bae, D. H. (2013). Optimal rainfall estimation by considering elevation in the Han River Basin, South Korea. *Journal of Applied Meteorology and Climatology*, 52(4), 802-818.
- Yun, H. S., Um, M. J., Cho, W. C., & Heo, J. H. (2009). Orographic precipitation analysis with regional frequency analysis and multiple linear regression. *Journal of Korea Water Resources Association*, 42(6), 465-480.
- Yune, C. Y., Jun, K. J., Kim, K. S., Kim, G. H., and Lee, S. W. (2010). Analysis of slope hazard-triggering rainfall characteristics in Gangwon Province by database construction. *Journal of the Korean Geotechnical Society*, 26(10), 27-38.
- Zachar, D. (2011). *Soil erosion*. Elsevier.
- Zaruba, Q., and Mencl, V. (2014). *Landslides and their control*. Elsevier.
- Zhang, K., Wang, S., Bao, H., & Zhao, X. (2019). Characteristics and influencing factors of rainfall-induced landslide and debris flow hazards in Shaanxi Province, China. *Natural Hazards and Earth System Sciences*, 19(1), 93-105.
